# Supplementary material for: Structural, magnetic and magnetocaloric effects in epitaxial La0.67Ba0.33Ti0.02Mn0.98O3 ferromagnetic thin films grown on 001-oriented SrTiO3 substrates
Source: Royal Society of Chemistry journal article supplement (doi:10.1039/c6dt01914e), 2016-01-01
Supplement: c6dt01914e1.pdf [file c6dt01914e1.pdf]

**Supplementary Information**

**Ma. Oumezzine et al. “Structural, Magnetic and Magnetocaloric effect in Epitaxial  $\text{La}_{0.67}\text{Ba}_{0.33}\text{Ti}_{0.02}\text{Mn}_{0.98}\text{O}_3$  Ferromagnetic thin films grown on 001-oriented  $\text{SrTiO}_3$  substrates”**

***Supplementary Information***

**Structural, Magnetic and Magnetocaloric effect in Epitaxial**

**$\text{La}_{0.67}\text{Ba}_{0.33}\text{Ti}_{0.02}\text{Mn}_{0.98}\text{O}_3$  Ferromagnetic thin films grown on 001-oriented  
 $\text{SrTiO}_3$  substrates**

Marwène Oumezzine<sup>1,\*</sup>, <sup>1</sup>Aurelian Catalin Galca<sup>2,\*</sup>, <sup>2</sup>Iuliana Pasuk<sup>2</sup>, Cristina Florentina Chirila<sup>2</sup>, Aurel Leca<sup>3</sup>, Victor Kuncser<sup>3</sup>, Liviu Cristian Tanase<sup>4,6</sup>, Andrei Kuncser<sup>5,6</sup>, Corneliu Ghica<sup>5</sup> and Mohamed Oumezzine<sup>1</sup>

<sup>1</sup>Laboratoire de Physico-chimie des Matériaux, Université de Monastir, Monastir, Tunisia.

<sup>2</sup>Laboratory of Multifunctional Materials and Structures, National Institute of Materials Physics, Magurele, Romania

<sup>3</sup> Laboratory of Magnetism and Superconductivity, National Institute of Materials Physics, Magurele, Romania

<sup>4</sup> Laboratory of Nanoscale Condensed Matter, National Institute of Materials Physics, Magurele, Romania

<sup>5</sup> Laboratory of Atomic Structures and Defects in Advanced Materials, National Institute of Materials Physics, Magurele, Romania

<sup>6</sup> Faculty of Physics, University of Bucharest, Magurele, Romania

---

<sup>1</sup> # Authors to whom any correspondence should be addressed.

e-mail: [oumezzine@hotmail.co.uk](mailto:oumezzine@hotmail.co.uk)

<sup>2</sup> e-mail: [ac\\_galca@infim.ro](mailto:ac_galca@infim.ro)

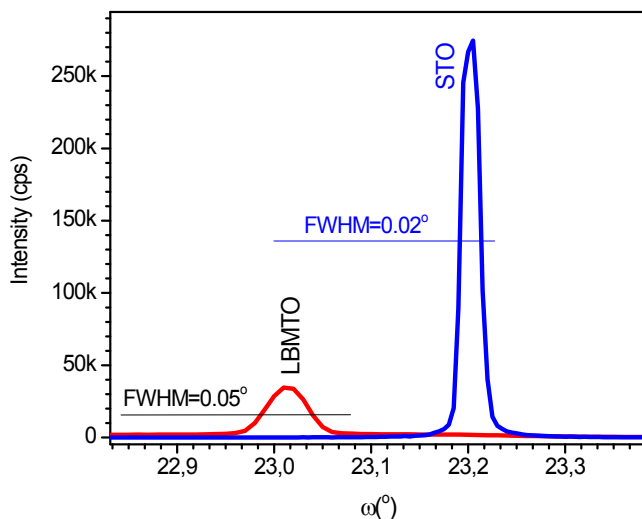

**Fig.S1.** The  $\omega$  rocking curves for the 002 peaks of LBTMO and STO. The full widths at half maximum of STO 002 peak and LBTMO 002 peak are about  $0.020^\circ$  and  $0.050^\circ$ , respectively, showing a satisfactory structural order in the perpendicular direction.

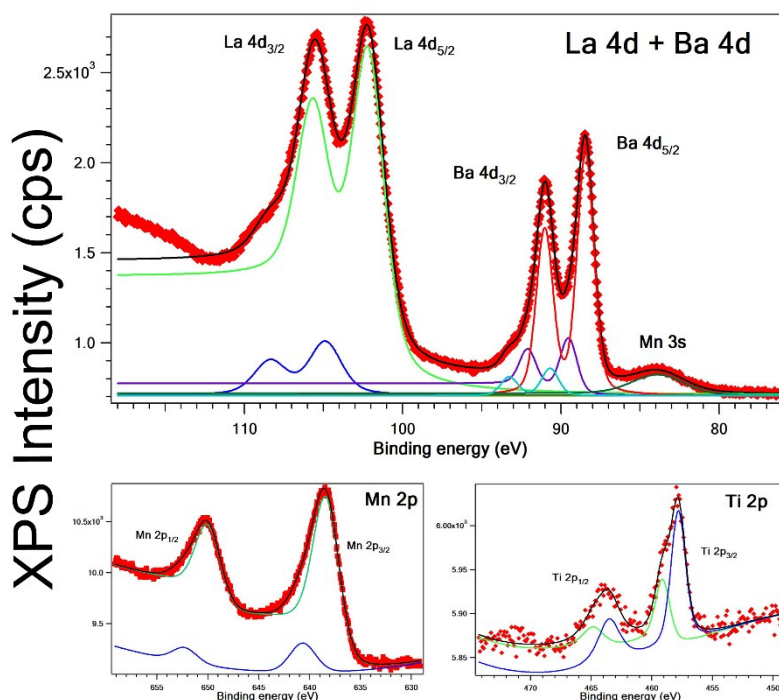

**Fig S2.** Selected La 4d, Ba 4d, Mn 2p and Ti 2p electron distribution curves for LBTMO surface, together with deconvolutions using Voigt profiles. The following 2 components were not taken into account for chemical composition analysis: i) the higher binding energy component in the spectra of La 4d which can be assigned to a shake-up satellite, often exhibited by the rare earth elements; ii) the lower binding energy component of Ti 2p given by the electrons originating from the most probably  $\text{TiO}_x$  terminated surface. The lowest binding energy component is assigned to  $\text{Mn}^{3+}$ , and the highest to  $\text{Mn}^{4+}$ .

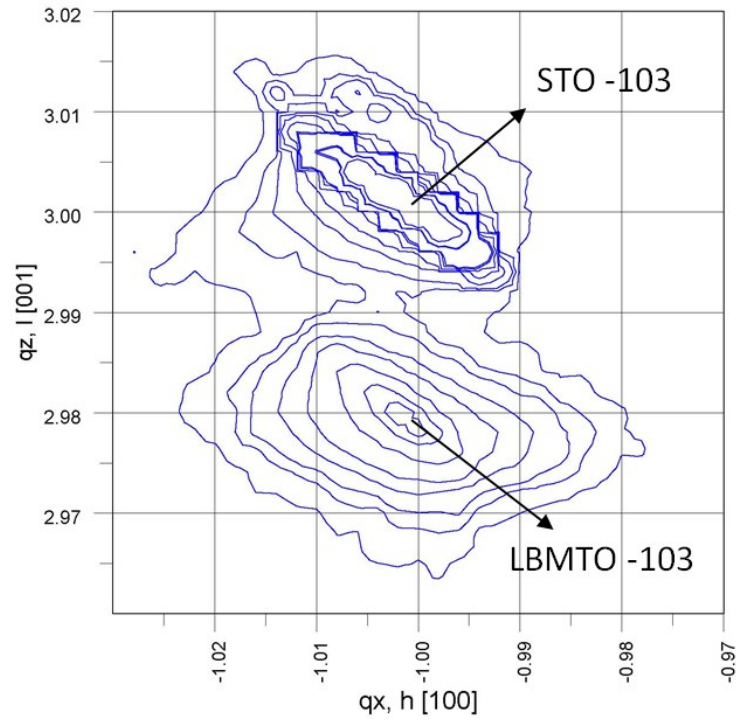

**Fig S3.** Reciprocal space mapping around the -103 node proving that the in-plane constant lattice of LBTMO thin film is identical with the one of the STO substrate.
